# Supplementary material
Source: PubMed Central journal article supplement (PMC5748225)
Supplement: pnas.201717219SI.pdf [file pnas.201717219SI.pdf]

# Supporting Information

Zhang et al. 10.1073/pnas.1717219115

As illustrated in Fig. 1 *E* and *F*, there are two adsorption sites at the surface of  $M_2C$ , which correspond to site i: HCP hollow site (stack as ABABAB...) and site ii: FCC hollow site (stack as ABCABC...), respectively. The two adsorption sites will generate three configurations denoted as I, II, and III (Fig. S1 *A–C*),

which correspond to the functional groups being adsorbed at pure site i, at pure site ii, and at both sites, respectively. It can be seen from Table S1 that the configuration II of  $Ti_2CT_2$  ( $T = F, O$ ) has the lowest adsorption energy, in agreement with previous studies (1).

1. Tang Q, Zhou Z, Shen P (2012) Are MXenes promising anode materials for Li ion batteries? Computational studies on electronic properties and Li storage capability of  $Ti_3C_2$  and  $Ti_3C_2X_2$  ( $X = F, OH$ ) monolayer. *J Am Chem Soc* 134:16909–16916.

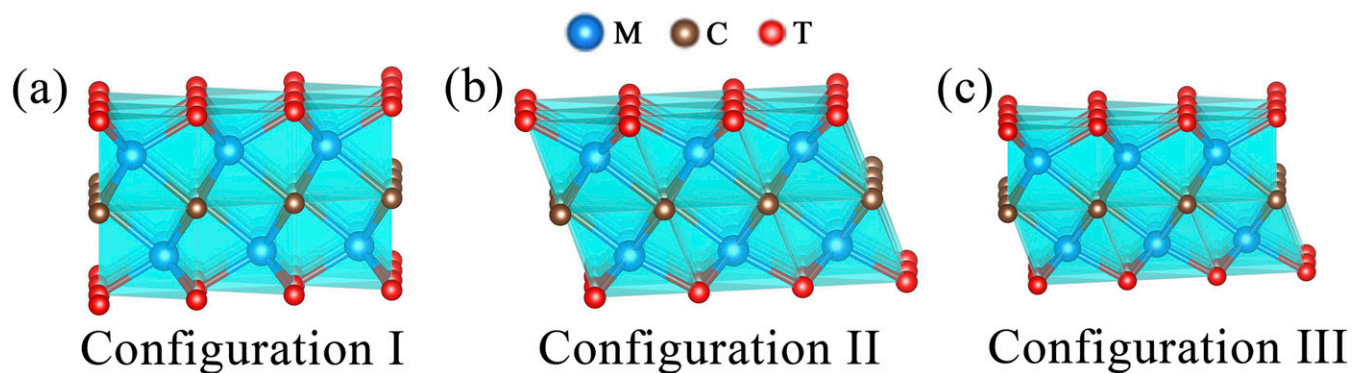

Fig. S1. (A–C) The atomic structures in configurations I, II, and III of  $M_2CT_2$  ( $T = O, F$ ), respectively.















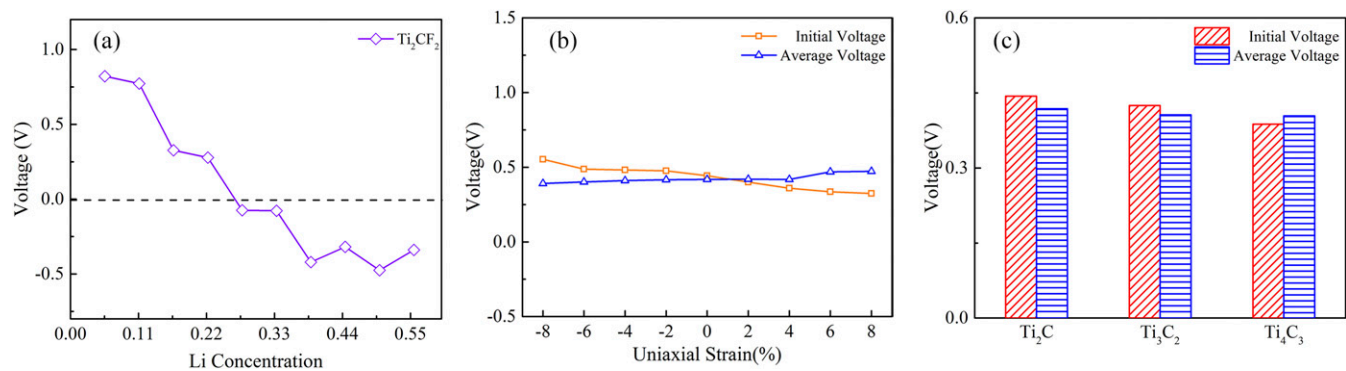

**Fig. S13.** A voltage profile of (A)  $\text{Ti}_2\text{CF}_2$  along different Li coverages. The initial voltages and the average voltages of (B)  $\text{Ti}_2\text{C}$  at the uniaxial strains. (C) The initial voltages and the average voltages of  $\text{Ti}_2\text{C}$ ,  $\text{Ti}_3\text{C}_2$ , and  $\text{Ti}_4\text{C}_3$ .

**Table S1.** The energy per primitive cell  $\text{M}_2\text{CT}_2$  ( $\text{M} = \text{Ti, Zr, T} = \text{O, F}$ ) of configurations I, II, and III

| Configuration | $\text{Ti}_2\text{CO}_2$ | $\text{Ti}_2\text{CF}_2$ | $\text{Zr}_2\text{CO}_2$ | $\text{Zr}_2\text{CF}_2$ |
|---------------|--------------------------|--------------------------|--------------------------|--------------------------|
| I             | 1.74                     | 0.53                     | 1.96                     | 0.34                     |
| II            | 0                        | 0                        | 0                        | 0                        |
| III           | 0.76                     | 0.20                     | 0.87                     | 0.06                     |

The energy of the most stable configuration is set to 0. The energy difference between the most stable configuration and the other configuration is shown.

**Table S2.** The energy per primitive cell of configurations I, II, and III in Fig. S2

| E/eV             | $\text{Ti}_2\text{C}$ | $\text{Zr}_2\text{C}$ | $\text{Hf}_2\text{C}$ | $\text{Ta}_2\text{C}$ | $\text{Mo}_2\text{C}$ | $\text{W}_2\text{C}$ | $\text{Ti}_2\text{CO}_2$ | $\text{Ti}_2\text{CF}_2$ | $\text{Zr}_2\text{CO}_2$ | $\text{Zr}_2\text{CF}_2$ | $\text{Ti}_3\text{C}_2$ | $\text{Ti}_4\text{C}_3$ |
|------------------|-----------------------|-----------------------|-----------------------|-----------------------|-----------------------|----------------------|--------------------------|--------------------------|--------------------------|--------------------------|-------------------------|-------------------------|
| I                | 0                     | 0                     | 0                     | 0.39                  | 0.11                  | 0                    | 0                        | 0.03                     | 0                        | 0                        | 0                       | 0                       |
| II               | 0.13                  | 0.14                  | 0.10                  | 0                     | 0                     | 0.08                 | 0.03                     | 0                        | 0.28                     | 0.05                     | 0.05                    | 0.01                    |
| III              | 0.39                  | 0.37                  | 0.44                  | 0.47                  | 0.19                  | 1.57                 | 0.25                     | 0.21                     | 0.34                     | 0.12                     | 0.09                    | 0.06                    |
| $d_l/\text{\AA}$ | 4.83                  | 5.34                  | 5.23                  | 4.99                  | 4.69                  | 4.96                 | 6.93                     | 7.10                     | 6.11                     | 7.06                     | 7.27                    | 9.79                    |

The energy of the most stable configuration is set to 0. The energy difference between the most stable configuration and the other configuration is shown.  $d_l$  is the layer thickness of the most stable configuration.
